# Supplementary material
Source: Springer Nature journal article supplement (https://www.springermedizin.de/resource/supplementary/12879_2013_2691_MOESM2_ESM.pdf/9445142)

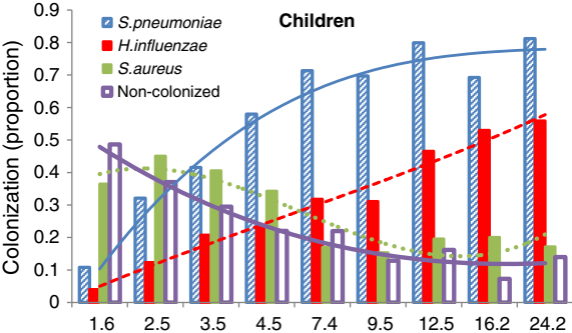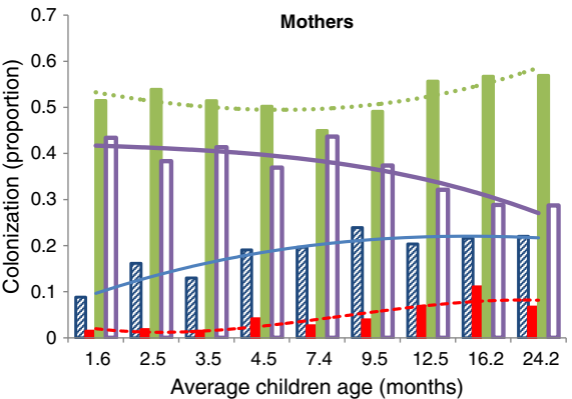

Supplement: MOESM2 [file 9445142]
